# Supplementary material for: Nanocomposites of hematite (α-Fe2O3) nanospindles with crumpled reduced graphene oxide nanosheets as high-performance anode material for lithium-ion batteries
Source: Royal Society of Chemistry journal article supplement (doi:10.1039/c2ra21411c), 2012-01-01
Supplement: c2ra21411c.pdf [file c2ra21411c.pdf]

## Electronic Supplementary Information

# Nanocomposites of hematite ( $\alpha$ -Fe<sub>2</sub>O<sub>3</sub>) nanospindles with crumpled reduced graphene oxide nanosheets as high-performance anode material for lithium-ion batteries

Song Bai,<sup>a</sup> Shuangqiang Chen,<sup>b</sup> Xiaoping Shen,<sup>\*a</sup>

Guoxing Zhu<sup>a</sup> and Guoxiu Wang<sup>b</sup>

<sup>a</sup> School of Chemistry and Chemical Engineering, Jiangsu University, Zhenjiang, 212013, China

<sup>b</sup> School of Chemistry and Forensic Science, University of Technology, Sydney, NSW 2007, Australia

\*Corresponding Author: Fax: (+86)511-88791800; Tel: (+86)511-88791800; E-mail: [xiaopingshen@163.com](mailto:xiaopingshen@163.com) (X. P. Shen).

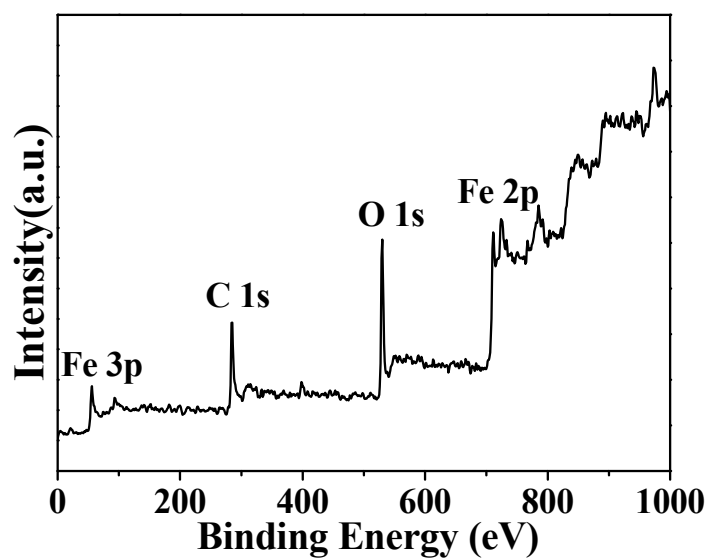

Fig. S1 XPS spectrum of RGO-Fe<sub>2</sub>O<sub>3</sub> nanocomposite.

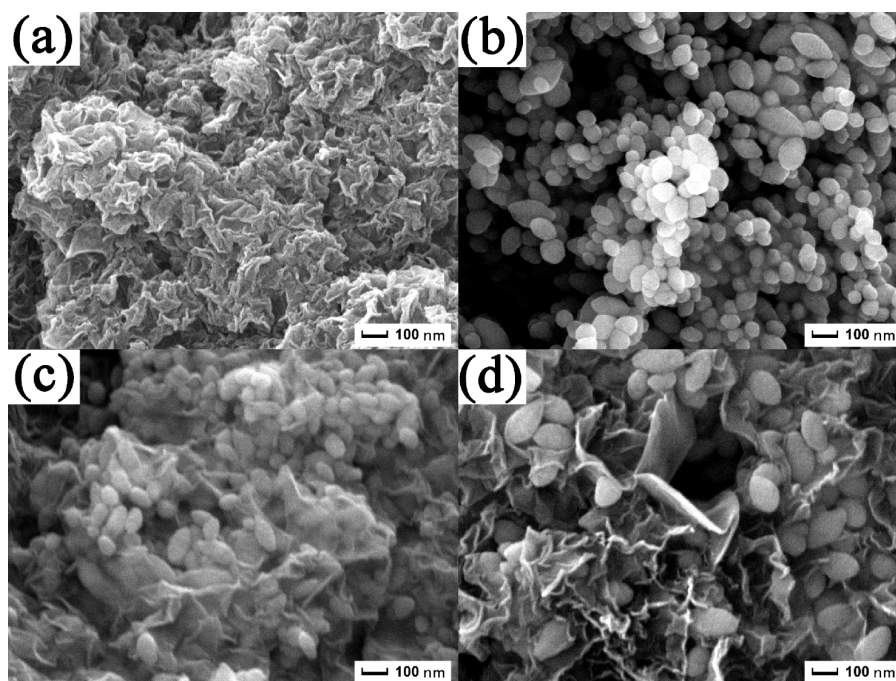

Fig. S2 High-magnification FESEM images of (a) RGO, (b) bare Fe<sub>2</sub>O<sub>3</sub>, (c) RGO-Fe<sub>2</sub>O<sub>3</sub>-H and (d) RGO-Fe<sub>2</sub>O<sub>3</sub>-L nanocomposites.

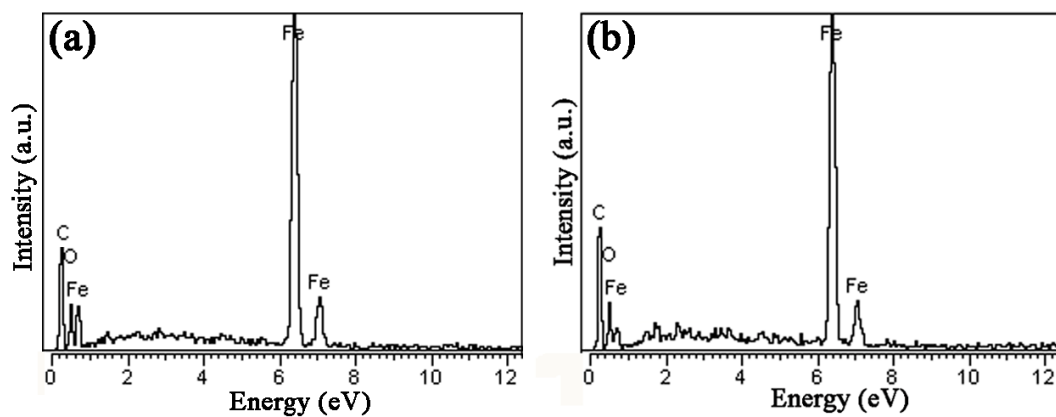

**Fig. S3** EDS spectra of (a) RGO-Fe<sub>2</sub>O<sub>3</sub>-H and (b) RGO-Fe<sub>2</sub>O<sub>3</sub>-L nanocomposites.

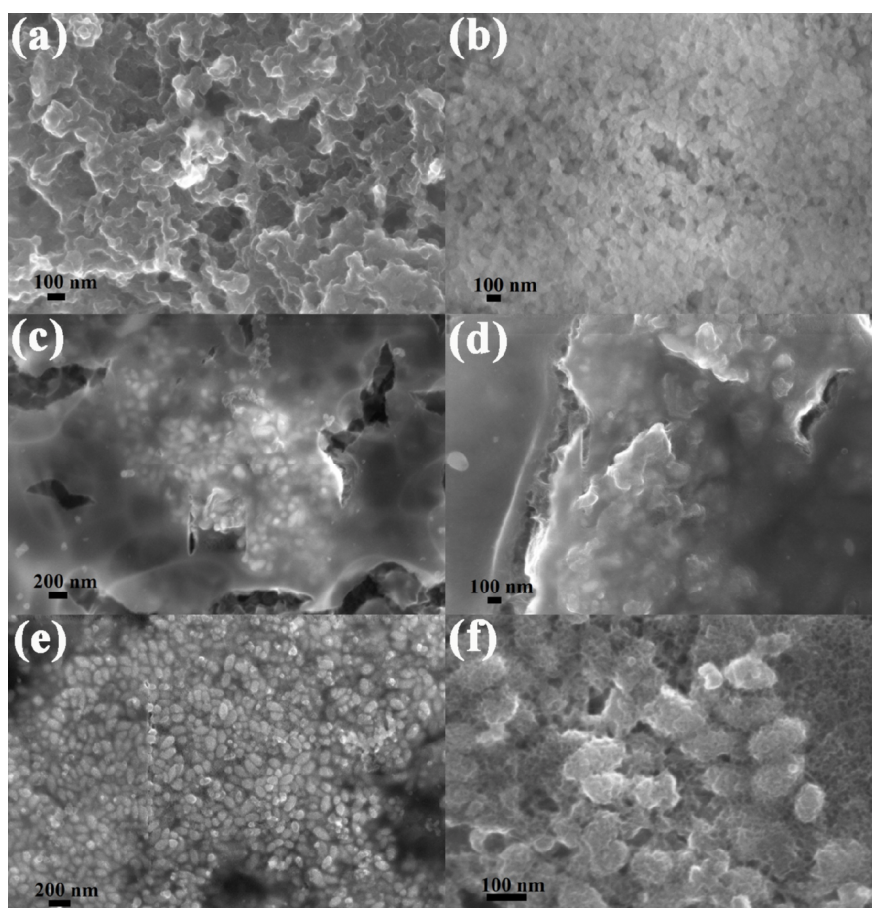

**Fig. S4** SEM images of (a) bare RGO nanosheets, (b) bare Fe<sub>2</sub>O<sub>3</sub> nanospindles, (c,d) RGO-Fe<sub>2</sub>O<sub>3</sub>-L, (e,f) RGO-Fe<sub>2</sub>O<sub>3</sub>-H after 100 cycles.
